# Supplementary material for: Plastron induced drag reduction and increased slip on a superhydrophobic sphere
Source: Royal Society of Chemistry journal article supplement (doi:10.1039/c1sm06140b), 2011-01-01
Supplement: c1sm06140b.pdf [file c1sm06140b.pdf]

*“Plastron Induced Drag Reduction and Increased Slip on a Superhydrophobic Sphere”, G. McHale, M.R. Flynn and M.I. Newton.*

## Appendix A – Streamfunctions

Ferreira *et al.* give the streamfunction solutions for single and multiple compound droplets in a creeping flow regime.<sup>1</sup> For a fluid-encapsulated fluid core of radius  $b$ , in axisymmetric creeping flow the three stream functions are,

Core ( $0 \leq r \leq b$ )

$$\psi_3 = \frac{U_\infty r^2 \sin^2 \theta}{2} \left( \frac{\eta_{12} \tilde{S}}{\tilde{\Delta}} \right) \left( 1 - \frac{r^2}{b^2} \right) \quad (\text{A1})$$

where  $\varepsilon = b/a$  and  $a$  is the radius of the fluid core together with the encapsulating fluid (see fig. 1 of the manuscript). Here  $U_\infty$  is the free stream velocity at large  $r$  and  $\eta_{12} = \eta_1/\eta_2$  is the ratio of the viscosity of the sheathing fluid (phase 1) to the external fluid (phase 2).

Sheathing fluid ( $b \leq r \leq b/\varepsilon$ )

$$\psi_1 = \frac{U_\infty r^2 \sin^2 \theta}{2} \left( \frac{1}{1 - \varepsilon^5} \right) \left( \frac{G(\varepsilon)}{\tilde{\Delta}} \right) \left[ 2\eta_{12} \left( \frac{\varepsilon^2 r^2}{b^2} - T + \frac{Tb}{r} - \frac{\varepsilon^2 b^3}{r^3} \right) + \eta_{32} (1 - \varepsilon) \left( \frac{\tilde{U} \varepsilon^2 r^2}{b^2} - \tilde{V} + \frac{\tilde{W}b}{\varepsilon r} - \frac{\tilde{X}b^3}{r^3} \right) \right] \quad (\text{A2})$$

where  $\eta_{32} = \eta_3/\eta_2$  is the ratio of the viscosity of the core fluid (phase 3) to the external fluid (phase 2).

External fluid ( $b/\varepsilon \leq r$ )

$$\psi_2 = \frac{U_\infty r \left( r - \frac{b}{\varepsilon} \right) \sin^2 \theta}{2} \left( \frac{1}{\tilde{\Delta}} \right) \left[ 2\eta_{12} F(\varepsilon) + \eta_{32} + \eta_{12} (2\eta_{12} G(\varepsilon) + \eta_{32} F(\varepsilon)) \left( 1 - \frac{b}{\varepsilon r} \right) \left( 2 + \frac{b}{\varepsilon r} \right) \right] \quad (\text{A3})$$

where

$$\tilde{\Delta} = \eta_{32} + 4\eta_{12}^2 G(\varepsilon) + 2\eta_{12}(1 + \eta_{32})F(\varepsilon) \quad (\text{A4})$$

and

$$\tilde{S} = \frac{(\varepsilon^2 + 3\varepsilon + 1)}{(1 - \varepsilon)(4\varepsilon^2 + 7\varepsilon + 4)} \quad (\text{A5a})$$

$$T = \frac{(1 - \varepsilon^5)}{(1 - \varepsilon)} = \varepsilon^4 + \varepsilon^3 + \varepsilon^2 + \varepsilon + 1 \quad (\text{A5b})$$

$$\tilde{U} = (\varepsilon + 2) \quad (\text{A5c})$$

$$\tilde{V} = (3\varepsilon^3 + 6\varepsilon^2 + 4\varepsilon + 2) \quad (\text{A5d})$$

$$\tilde{W} = \varepsilon(2\varepsilon^3 + 4\varepsilon^2 + 6\varepsilon + 3) \quad (\text{A5e})$$

$$\tilde{X} = (2\varepsilon + 1) \quad (\text{A5f})$$

In the limit of a solid core (i.e.  $\eta_{32} \rightarrow \infty$ ), these equations reduce to,

$$\psi_3 = 0 \quad 0 \leq r \leq b \quad (\text{A6})$$

$$\psi_1 = \frac{U_\infty r^2 \sin^2 \theta}{2} \frac{G(\varepsilon)}{1 + 2\eta_{12}F(\varepsilon)} \left( \frac{1}{T} \right) \left[ \frac{\tilde{U}\varepsilon^2 r^2}{b^2} - \tilde{V} + \frac{\tilde{W}b}{\varepsilon r} - \frac{\tilde{X}b^3}{r^3} \right] \quad b \leq r \leq b/\varepsilon \quad (\text{A7})$$

$$\psi_2 = \frac{U_\infty r \left( r - \frac{b}{\varepsilon} \right) \sin^2 \theta}{2} \left( \frac{1}{1 + 2\eta_{12}F(\varepsilon)} \right) \left[ 1 + \eta_{12} \left( 1 - \frac{b}{\varepsilon r} \right) \left( 2 + \frac{b}{\varepsilon r} \right) F(\varepsilon) \right] \quad b/\varepsilon \leq r \quad (\text{A8})$$

Note that  $\psi_1$  vanishes at both  $b$  and  $b/\varepsilon$ , and  $\psi_2$  vanishes at  $b/\varepsilon$  (see fig. 3 of the manuscript). In the limit  $r \rightarrow \infty$ , the stream function  $\psi_2 \rightarrow 0.5U_\infty r^2 \sin^2 \theta$ , which is the expected free stream value.

## Reference

1. J. M. Ferreira, A. A. Soares and R. P. Chhabra, *Fluid Dyn. Res.*, **2003** 32, 210-215.
